# Supplementary material
Source: PubMed Central journal article supplement (PMC10792435)
Supplement: NIHMS1949686-supplement-1.pdf [file NIHMS1949686-supplement-1.pdf]

**Supplemental Table 1. Associations between visual impairment (NEI VFQ) and cognitive function at Visit 1 and SOL-INCA, on average 7-years later. Additional modeling steps including sequential adjustments to covariables.**

**Visit 1 Results**

| <b>Outcome</b>            | <b>M1<br/>β(SE)</b> | <b>M1_1<br/>β(SE)</b> | <b>M1_2<br/>β(SE)</b> | <b>M1_3<br/>β(SE)</b> | <b>M1_4<br/>β(SE)</b> | <b>M1_5<br/>β(SE)</b> | <b>M1_6<br/>β(SE)</b> | <b>M2_1<br/>β(SE)</b> | <b>M2_2<br/>β(SE)</b> | <b>M2_3<br/>β(SE)</b> | <b>M2_4<br/>β(SE)</b> | <b>M2_5<br/>β(SE)</b> | <b>M2_6<br/>β(SE)</b> | <b>M2<br/>β(SE)</b> |
|---------------------------|---------------------|-----------------------|-----------------------|-----------------------|-----------------------|-----------------------|-----------------------|-----------------------|-----------------------|-----------------------|-----------------------|-----------------------|-----------------------|---------------------|
| <b>B-SEVLT-Sum</b>        | -0.12**<br>(0.04)   | -0.12**<br>(0.04)     | -0.12**<br>(0.04)     | -0.12**<br>(0.04)     | -0.12**<br>(0.04)     | -0.12**<br>(0.04)     | -0.12**<br>(0.04)     | -0.11**<br>(0.04)     | -0.10*<br>(0.04)      | -0.10**<br>(0.04)     | -0.10*<br>(0.04)      | -0.10**<br>(0.04)     | -0.10**<br>(0.04)     | -0.09*<br>(0.04)    |
| Unweighted n              | 662                 | 662                   | 662                   | 662                   | 662                   | 662                   | 662                   | 662                   | 662                   | 662                   | 662                   | 662                   | 662                   | 662                 |
| <b>B-SEVLT-Recall</b>     | -0.14**<br>(0.04)   | -0.14**<br>(0.04)     | -0.14**<br>(0.04)     | -0.14**<br>(0.04)     | -0.14**<br>(0.04)     | -0.14***<br>(0.04)    | -0.14**<br>(0.04)     | -0.14***<br>(0.04)    | -0.14***<br>(0.04)    | -0.14***<br>(0.04)    | -0.14***<br>(0.04)    | -0.14***<br>(0.04)    | -0.13***<br>(0.04)    | -0.13**<br>(0.04)   |
| Unweighted n              | 665                 | 665                   | 665                   | 665                   | 665                   | 665                   | 665                   | 665                   | 665                   | 665                   | 665                   | 665                   | 665                   | 665                 |
| <b>Word Fluency</b>       | -0.12**<br>(0.04)   | -0.12**<br>(0.04)     | -0.10*<br>(0.04)      | -0.12**<br>(0.04)     | -0.11*<br>(0.04)      | -0.12**<br>(0.04)     | -0.11*<br>(0.04)      | -0.08<br>(0.04)       | -0.06<br>(0.04)       | -0.08<br>(0.04)       | -0.07<br>(0.04)       | -0.08<br>(0.04)       | -0.07<br>(0.04)       | -0.05<br>(0.04)     |
| Unweighted n              | 662                 | 662                   | 662                   | 662                   | 662                   | 662                   | 662                   | 662                   | 662                   | 662                   | 662                   | 662                   | 662                   | 662                 |
| <b>Digit &amp; Symbol</b> | -0.24***<br>(0.04)  | -0.23***<br>(0.04)    | -0.24***<br>(0.04)    | -0.24***<br>(0.04)    | -0.23***<br>(0.04)    | -0.24***<br>(0.04)    | -0.24***<br>(0.04)    | -0.18***<br>(0.04)    | -0.19***<br>(0.03)    | -0.19***<br>(0.03)    | -0.18***<br>(0.03)    | -0.19***<br>(0.03)    | -0.19***<br>(0.03)    | -0.17***<br>(0.03)  |
| Unweighted n              | 656                 | 656                   | 656                   | 656                   | 656                   | 656                   | 656                   | 656                   | 656                   | 656                   | 656                   | 656                   | 656                   | 656                 |
| <b>Global Cognition</b>   | -0.16***<br>(0.03)  | -0.16***<br>(0.03)    | -0.15***<br>(0.03)    | -0.16***<br>(0.03)    | -0.15***<br>(0.03)    | -0.16***<br>(0.03)    | -0.16***<br>(0.03)    | -0.13***<br>(0.03)    | -0.12***<br>(0.03)    | -0.13***<br>(0.03)    | -0.13***<br>(0.03)    | -0.13***<br>(0.03)    | -0.13***<br>(0.03)    | -0.12***<br>(0.03)  |
| Unweighted n              | 665                 | 665                   | 665                   | 665                   | 665                   | 665                   | 665                   | 665                   | 665                   | 665                   | 665                   | 665                   | 665                   | 665                 |

Note 1: NEI VFQ = National Eye Institute Visual Function Questionnaire; standardized measure is used in the estimations

Note 2: Model 1 is crude (unadjusted)

Note 3: Model 1\_s are adjusted for each of the sleep measures independently (i.e., M1\_1: M1 + Sleepiness, M1\_2: M1 + Insomnia, M1\_3: M1 + Apnea, M1\_4: M1 + Duration, M1\_5: M1 + Nap, M1\_6: M1 + Quality)

Note 4: Model 2\_s are adjusted for each of the sleep measures and following sociodemographic factors: age, sex, and education (i.e., M2\_1: M1 + Sleepiness + sociodemographic, M2\_2: M1 + Insomnia + sociodemographic, M2\_3: M1 + Apnea + sociodemographic, M2\_4: M1 + Duration + sociodemographic, M2\_5: M1 + Nap + sociodemographic, M2\_6: M1 + Quality + sociodemographic)

Note 5: Model 2 is adjusted for all sleep measures (sleepiness, insomnia, apnea, duration, nap, quality) and full covariates (all sociodemographic characteristics, behavioral risk factors, acculturation measures, and health conditions)

Note 6: \*\*\* p<0.001; \*\* p<0.01; \* p<0.05

SOL-INCA Results

|                           | M1           | M1_1         | M1_2         | M1_3         | M1_4         | M1_5         | M1_6         | M2_1         | M2_2         | M2_3         | M2_4         | M2_5         | M2_6         | M2           |
|---------------------------|--------------|--------------|--------------|--------------|--------------|--------------|--------------|--------------|--------------|--------------|--------------|--------------|--------------|--------------|
| Outcome                   | $\beta$ (SE) |
| <b>B-SEVLT-Sum</b>        | -0.15*       | -0.14*       | -0.16*       | -0.15**      | -0.15*       | -0.16**      | -0.17**      | -0.15**      | -0.15**      | -0.15**      | -0.15**      | -0.15**      | -0.16***     | -0.14**      |
| Unweighted n              | (0.06)       | (0.06)       | (0.06)       | (0.06)       | (0.06)       | (0.06)       | (0.06)       | (0.05)       | (0.05)       | (0.05)       | (0.05)       | (0.05)       | (0.05)       | (0.04)       |
|                           | 663          | 663          | 663          | 663          | 663          | 663          | 663          | 663          | 663          | 663          | 663          | 663          | 663          | 663          |
| <b>B-SEVLT-Recall</b>     | -0.09        | -0.09        | -0.10        | -0.09        | -0.09        | -0.10        | -0.10        | -0.09*       | -0.08        | -0.09*       | -0.09*       | -0.09*       | -0.09*       | -0.10**      |
| Unweighted n              | (0.05)       | (0.05)       | (0.06)       | (0.05)       | (0.05)       | (0.05)       | (0.06)       | (0.04)       | (0.04)       | (0.04)       | (0.04)       | (0.04)       | (0.04)       | (0.04)       |
|                           | 662          | 662          | 662          | 662          | 662          | 662          | 662          | 662          | 662          | 662          | 662          | 662          | 662          | 662          |
| <b>Word Fluency</b>       | -0.23***     | -0.23***     | -0.24***     | -0.23***     | -0.23***     | -0.24***     | -0.25***     | -0.19***     | -0.20***     | -0.18***     | -0.19***     | -0.19***     | -0.20***     | -0.18***     |
| Unweighted n              | (0.05)       | (0.05)       | (0.05)       | (0.05)       | (0.05)       | (0.04)       | (0.05)       | (0.04)       | (0.04)       | (0.04)       | (0.04)       | (0.04)       | (0.04)       | (0.04)       |
|                           | 663          | 663          | 663          | 663          | 663          | 663          | 663          | 663          | 663          | 663          | 663          | 663          | 663          | 663          |
| <b>Digit &amp; Symbol</b> | -0.24***     | -0.24***     | -0.25***     | -0.24***     | -0.24***     | -0.25***     | -0.26***     | -0.20***     | -0.20***     | -0.20***     | -0.20***     | -0.20***     | -0.21***     | -0.19***     |
| Unweighted n              | (0.06)       | (0.06)       | (0.06)       | (0.06)       | (0.06)       | (0.06)       | (0.06)       | (0.04)       | (0.04)       | (0.03)       | (0.04)       | (0.03)       | (0.04)       | (0.03)       |
|                           | 659          | 659          | 659          | 659          | 659          | 659          | 659          | 659          | 659          | 659          | 659          | 659          | 659          | 659          |
| <b>Global Cognition</b>   | -0.18***     | -0.17***     | -0.18***     | -0.18***     | -0.17***     | -0.18***     | -0.19***     | -0.15***     | -0.15***     | -0.15***     | -0.15***     | -0.15***     | -0.16***     | -0.15***     |
| Unweighted n              | (0.05)       | (0.05)       | (0.05)       | (0.04)       | (0.05)       | (0.04)       | (0.05)       | (0.03)       | (0.03)       | (0.03)       | (0.03)       | (0.03)       | (0.03)       | (0.03)       |
|                           | 663          | 663          | 663          | 663          | 663          | 663          | 663          | 663          | 663          | 663          | 663          | 663          | 663          | 663          |

Note 1: NEI VFQ = National Eye Institute Visual Function Questionnaire; standardized measure is used in the estimations

Note 2: Model 1 is crude (unadjusted)

Note 3: Model 1\_s are adjusted for each of the sleep measures independently (i.e., M1\_1: M1 + Sleepiness, M1\_2: M1 + Insomnia, M1\_3: M1 + Apnea, M1\_4: M1 + Duration, M1\_5: M1 + Nap, M1\_6: M1 + Quality)

Note 4: Model 2\_s are adjusted for each of the sleep measures and following sociodemographic factors: age, sex, and education (i.e., M2\_1: M1 + Sleepiness + sociodemographic, M2\_2: M1 + Insomnia + sociodemographic, M2\_3: M1 + Apnea + sociodemographic, M2\_4: M1 + Duration + sociodemographic, M2\_5: M1 + Nap + sociodemographic, M2\_6: M1 + Quality + sociodemographic)

Note 5: Model 2 is adjusted for all sleep measures (sleepiness, insomnia, apnea, duration, nap, quality) and full covariates (all sociodemographic characteristics, behavioral risk factors, acculturation measures, and health conditions)

Note 6: \*\*\* p<0.001; \*\* p<0.01; \* p<0.05

**Supplemental Table 2. Associations between visual impairment (NEI VFQ) and cognitive change between Visit 1 and SOL-INCA, on average 7-years later. Additional modeling steps including sequential adjustments to covariables.**

|                           | M1                | M1_1              | M1_2              | M1_3              | M1_4              | M1_5              | M1_6               | M2_1              | M2_2              | M2_3              | M2_4              | M2_5              | M2_6              | M2                |
|---------------------------|-------------------|-------------------|-------------------|-------------------|-------------------|-------------------|--------------------|-------------------|-------------------|-------------------|-------------------|-------------------|-------------------|-------------------|
| <b>Outcome</b>            | <b>β(SE)</b>       | <b>β(SE)</b>      | <b>β(SE)</b>      | <b>β(SE)</b>      | <b>β(SE)</b>      | <b>β(SE)</b>      | <b>β(SE)</b>      | <b>β(SE)</b>      |
| <b>B-SEVLT-Sum</b>        | -0.09<br>(0.07)   | -0.08<br>(0.07)   | -0.10<br>(0.08)   | -0.08<br>(0.07)   | -0.08<br>(0.07)   | -0.10<br>(0.07)   | -0.11<br>(0.07)    | -0.09<br>(0.06)   | -0.10<br>(0.06)   | -0.09<br>(0.06)   | -0.10<br>(0.06)   | -0.10<br>(0.06)   | -0.11<br>(0.06)   | -0.09<br>(0.06)   |
| Unweighted n              | 660               | 660               | 660               | 660               | 660               | 660               | 660                | 660               | 660               | 660               | 660               | 660               | 660               | 660               |
| <b>B-SEVLT-Recall</b>     | -0.02<br>(0.06)   | -0.02<br>(0.05)   | -0.02<br>(0.06)   | -0.01<br>(0.05)   | -0.01<br>(0.05)   | -0.02<br>(0.06)   | -0.03<br>(0.06)    | -0.02<br>(0.05)   | -0.00<br>(0.05)   | -0.01<br>(0.05)   | -0.01<br>(0.05)   | -0.01<br>(0.05)   | -0.02<br>(0.05)   | -0.02<br>(0.05)   |
| Unweighted n              | 662               | 662               | 662               | 662               | 662               | 662               | 662                | 662               | 662               | 662               | 662               | 662               | 662               | 662               |
| <b>Word Fluency</b>       | -0.17**<br>(0.06) | -0.17**<br>(0.06) | -0.20**<br>(0.06) | -0.17**<br>(0.06) | -0.17**<br>(0.06) | -0.18**<br>(0.06) | -0.21***<br>(0.06) | -0.15**<br>(0.06) | -0.18**<br>(0.06) | -0.16**<br>(0.06) | -0.16**<br>(0.06) | -0.17**<br>(0.05) | -0.19**<br>(0.06) | -0.17**<br>(0.05) |
| Unweighted n              | 660               | 660               | 660               | 660               | 660               | 660               | 660                | 660               | 660               | 660               | 660               | 660               | 660               | 660               |
| <b>Digit &amp; Symbol</b> | -0.02<br>(0.08)   | -0.03<br>(0.08)   | -0.03<br>(0.08)   | -0.02<br>(0.08)   | -0.02<br>(0.08)   | -0.02<br>(0.08)   | -0.04<br>(0.09)    | -0.03<br>(0.07)   | -0.02<br>(0.07)   | -0.02<br>(0.07)   | -0.02<br>(0.07)   | -0.02<br>(0.07)   | -0.03<br>(0.07)   | -0.00<br>(0.07)   |
| Unweighted n              | 650               | 650               | 650               | 650               | 650               | 650               | 650                | 650               | 650               | 650               | 650               | 650               | 650               | 650               |
| <b>Global Cognition</b>   | -0.08<br>(0.08)   | -0.08<br>(0.08)   | -0.09<br>(0.08)   | -0.07<br>(0.07)   | -0.08<br>(0.08)   | -0.09<br>(0.07)   | -0.11<br>(0.08)    | -0.07<br>(0.06)   | -0.08<br>(0.07)   | -0.07<br>(0.07)   | -0.07<br>(0.07)   | -0.08<br>(0.07)   | -0.10<br>(0.07)   | -0.07<br>(0.07)   |
| Unweighted n              | 663               | 663               | 663               | 663               | 663               | 663               | 663                | 663               | 663               | 663               | 663               | 663               | 663               | 663               |

Note 1: NEI VFQ = National Eye Institute Visual Function Questionnaire; standardized measure is used in the estimations

Note 2: Model 1 is crude (unadjusted)

Note 3: Model 1\_s are adjusted for each of the sleep measures independently (i.e., M1\_1: M1 + Sleepiness, M1\_2: M1 + Insomnia, M1\_3: M1 + Apnea, M1\_4: M1 + Duration, M1\_5: M1 + Nap, M1\_6: M1 + Quality)

Note 4: Model 2\_s are adjusted for each of the sleep measures and following sociodemographic factors: age, sex, and education (i.e., M2\_1: M1 + Sleepiness + sociodemographic, M2\_2: M1 + Insomnia + sociodemographic, M2\_3: M1 + Apnea + sociodemographic, M2\_4: M1 + Duration + sociodemographic, M2\_5: M1 + Nap + sociodemographic, M2\_6: M1 + Quality + sociodemographic)

Note 5: Model 2 is adjusted for all sleep measures (sleepiness, insomnia, apnea, duration, nap, quality) and full covariates (all sociodemographic characteristics, behavioral risk factors, acculturation measures, and health conditions)

Note 6: \*\*\* p<0.001; \*\* p<0.01; \* p<0.05

### Missingness Analysis

Supplemental Table 3. Descriptive characteristics of excluded and included subsamples.

|                                    | Excluded<br>(Unweighted n=181) | Included<br>(Unweighted n=665) | Overall    | P-value | Unweighted n |
|------------------------------------|--------------------------------|--------------------------------|------------|---------|--------------|
| <b>Sex (%)</b>                     |                                |                                |            |         |              |
| Female                             | 55.2 (5.9)                     | 52.7 (2.6)                     | 53.3 (2.3) | 0.71    | 846          |
| Male                               | 44.8 (5.9)                     | 47.3 (2.6)                     | 46.7 (2.3) |         |              |
| <b>Heritage (%)</b>                |                                |                                |            |         |              |
| Cuban                              | 69.7 (4.5)                     | 69.7 (2.9)                     | 69.7 (2.5) | 0.08    | 845          |
| Central/South American             | 16.9 (3.3)                     | 22.9 (2.4)                     | 21.5 (2.1) |         |              |
| Other                              | 13.4 (3.5)                     | 7.4 (1.3)                      | 8.8 (1.5)  |         |              |
| <b>Education (%)</b>               |                                |                                |            |         |              |
| Less than HS                       | 19.0 (4.0)                     | 26.3 (2.6)                     | 24.5 (2.4) | 0.13    | 845          |
| HS or equivalent                   | 19.1 (3.5)                     | 21.5 (1.9)                     | 20.9 (1.7) |         |              |
| Greater than HS                    | 62.0 (4.9)                     | 52.2 (2.7)                     | 54.6 (2.6) |         |              |
| <b>Marital Status (%)</b>          |                                |                                |            |         |              |
| Single                             | 21.1 (5.5)                     | 17.3 (1.9)                     | 18.2 (2.1) | 0.71    | 843          |
| Married/cohabit                    | 49.8 (5.8)                     | 52.8 (2.9)                     | 52.1 (2.8) |         |              |
| Separated/Divorced/Widowed         | 29.1 (4.4)                     | 29.9 (2.5)                     | 29.7 (2.2) |         |              |
| <b>Income (%)</b>                  |                                |                                |            |         |              |
| <20k                               | 54.1 (5.7)                     | 54.4 (3.5)                     | 54.3 (3.1) | 0.71    | 846          |
| 20-40k                             | 25.8 (4.3)                     | 25.0 (2.8)                     | 25.2 (2.3) |         |              |
| 40k+                               | 11.1 (4.1)                     | 8.6 (1.9)                      | 9.2 (2.2)  |         |              |
| Not reported                       | 9.0 (2.3)                      | 12.0 (1.5)                     | 11.2 (1.3) |         |              |
| <b>Insurance (%)</b>               |                                |                                |            |         |              |
| Uninsured                          | 49.0 (6.2)                     | 57.9 (2.8)                     | 55.7 (2.8) | 0.16    | 843          |
| Insured/Medicaid                   | 51.0 (6.2)                     | 42.1 (2.8)                     | 44.3 (2.8) |         |              |
| <b>Employment (%)</b>              |                                |                                |            |         |              |
| Employed                           | 35.1 (5.0)                     | 44.6 (2.9)                     | 42.3 (2.7) | 0.19    | 845          |
| Retired and not currently employed | 25.4 (6.4)                     | 17.3 (2.9)                     | 19.3 (2.9) |         |              |
| Unemployed                         | 39.5 (5.5)                     | 38.1 (2.7)                     | 38.5 (2.6) |         |              |
| <b>Alcohol (%)</b>                 |                                |                                |            |         |              |
| Never                              | 44.5 (5.6)                     | 32.5 (2.2)                     | 35.4 (2.2) | 0.08    | 844          |
| Former                             | 15.7 (3.4)                     | 20.8 (2.2)                     | 19.5 (1.9) |         |              |
| Current                            | 39.8 (5.2)                     | 46.8 (2.8)                     | 45.0 (2.5) |         |              |

|                                            |            |            |            |      |     |  |
|--------------------------------------------|------------|------------|------------|------|-----|--|
| <b>Smoking (%)</b>                         |            |            |            |      |     |  |
| Never                                      | 51.1 (5.7) | 50.2 (2.7) | 50.5 (2.5) | 0.62 | 843 |  |
| Former                                     | 31.8 (5.9) | 28.3 (2.7) | 29.1 (2.3) |      |     |  |
| Current                                    | 17.0 (3.7) | 21.5 (1.9) | 20.4 (1.7) |      |     |  |
| <b>Physical Activity (%)</b>               |            |            |            |      |     |  |
| No                                         | 43.2 (5.7) | 45.9 (2.7) | 45.3 (2.5) | 0.66 | 844 |  |
| Yes                                        | 56.8 (5.7) | 54.1 (2.7) | 54.7 (2.5) |      |     |  |
| <b>Language (%)</b>                        |            |            |            |      |     |  |
| Spanish preferred                          | 87.7 (5.7) | 93.4 (1.2) | 92.0 (1.7) | 0.10 | 845 |  |
| English preferred                          | 1.7 (1.2)  | 2.8 (1.0)  | 2.6 (0.8)  |      |     |  |
| Both equally                               | 10.6 (5.8) | 3.7 (0.9)  | 5.4 (1.6)  |      |     |  |
| <b>Hypertension (%)</b>                    |            |            |            |      |     |  |
| No                                         | 46.1 (5.7) | 52.5 (2.3) | 50.9 (2.3) | 0.30 | 846 |  |
| Yes                                        | 53.9 (5.7) | 47.5 (2.3) | 49.1 (2.3) |      |     |  |
| <b>Diabetes (%)</b>                        |            |            |            |      |     |  |
| No                                         | 70.0 (5.6) | 71.5 (2.8) | 71.2 (2.7) | 0.79 | 846 |  |
| Yes                                        | 30.0 (5.6) | 28.5 (2.8) | 28.8 (2.7) |      |     |  |
| <b>CHD (%)</b>                             |            |            |            |      |     |  |
| No                                         | 95.8 (1.6) | 91.8 (1.7) | 92.8 (1.4) | 0.09 | 844 |  |
| Yes                                        | 4.2 (1.6)  | 8.2 (1.7)  | 7.2 (1.4)  |      |     |  |
| <b>Heart Failure (%)</b>                   |            |            |            |      |     |  |
| No                                         | 99.7 (0.3) | 97.1 (1.1) | 97.7 (0.9) | 0.01 | 843 |  |
| Yes                                        | 0.3 (0.3)  | 2.9 (1.1)  | 2.3 (0.9)  |      |     |  |
| <b>Stroke/TIA (%)</b>                      |            |            |            |      |     |  |
| No                                         | 95.9 (2.3) | 96.1 (1.6) | 96.1 (1.2) | 0.92 | 844 |  |
| Yes                                        | 4.1 (2.3)  | 3.9 (1.6)  | 3.9 (1.2)  |      |     |  |
| <b>Age (mean, SD)</b>                      | 58.9 (8.0) | 57.4 (8.1) | 57.8 (8.1) | 0.20 | 846 |  |
| <b>BMI (mean, SD)</b>                      | 29.1 (4.9) | 29.7 (5.6) | 29.6 (5.5) | 0.36 | 844 |  |
| <b>Acculturation - language (mean, SD)</b> | 1.4 (0.5)  | 1.4 (0.6)  | 1.4 (0.6)  | 0.80 | 845 |  |

Note 1: Variables are measured at Visit 1

Note 2: HS=High School, CHD=Coronary heart disease, TIA=Transient ischemic attack, BMI=Body mass index, SD=standard deviation

Note 3: Survey adjusted chi-squared tests, t-tests were used for categorical and continuous variables, respectively.

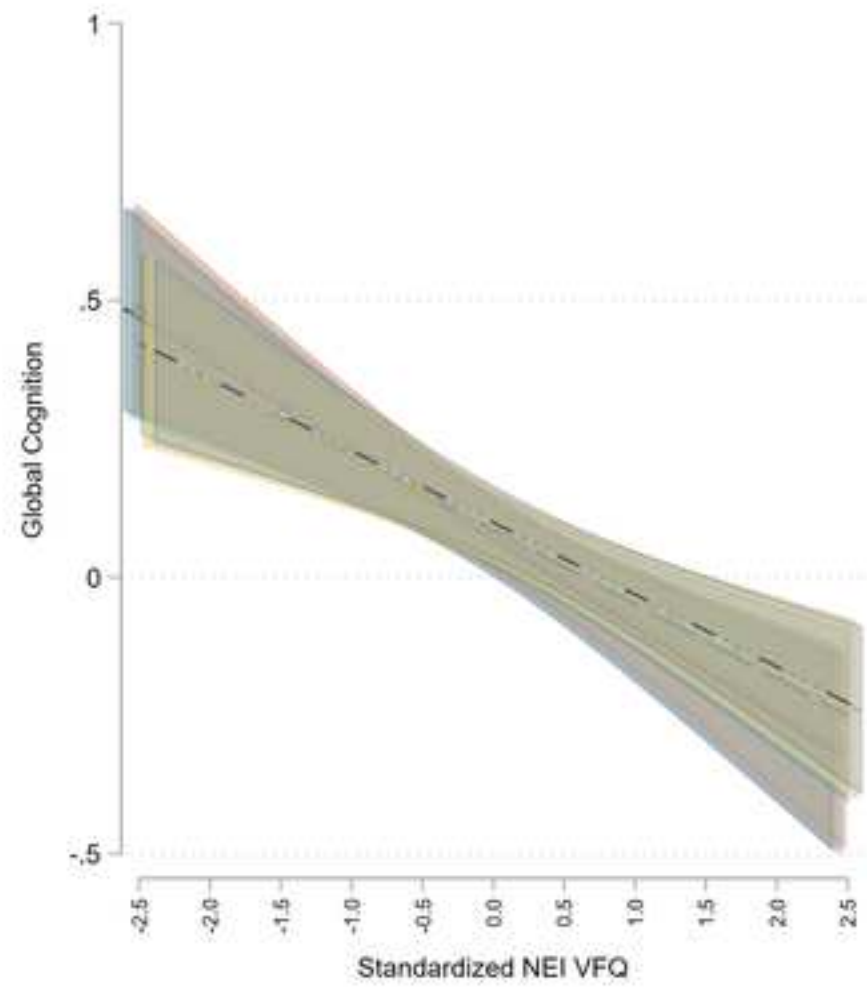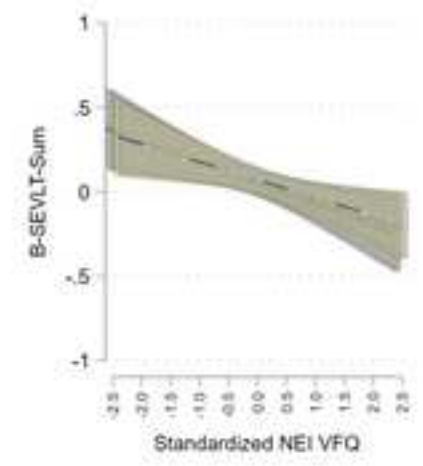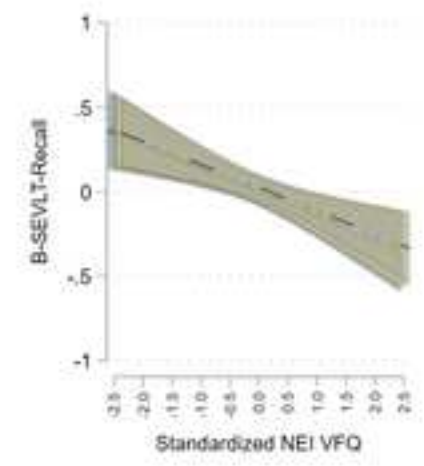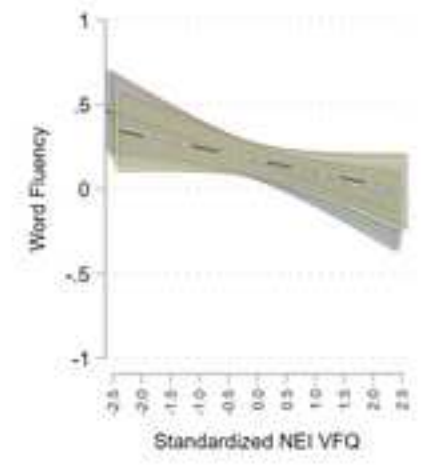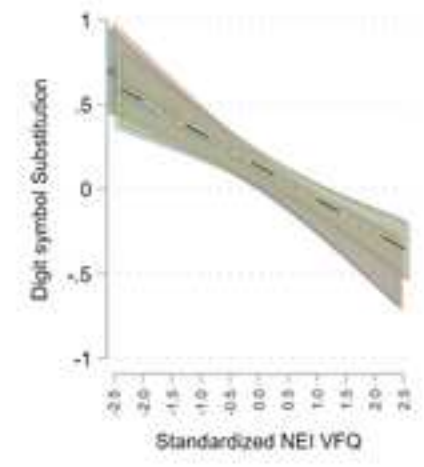

- |             |               |                   |                   |                   |                   |
|-------------|---------------|-------------------|-------------------|-------------------|-------------------|
| — Model 1_1 | - - Model 1_2 | - · · · Model 1_3 | · · · · Model 1_4 | - · · · Model 1_5 | · · · · Model 1_6 |
| — Model 2_1 | - - Model 2_2 | - · · · Model 2_3 | — Model 2_4       | — Model 2_5       | - · · · Model 2_6 |

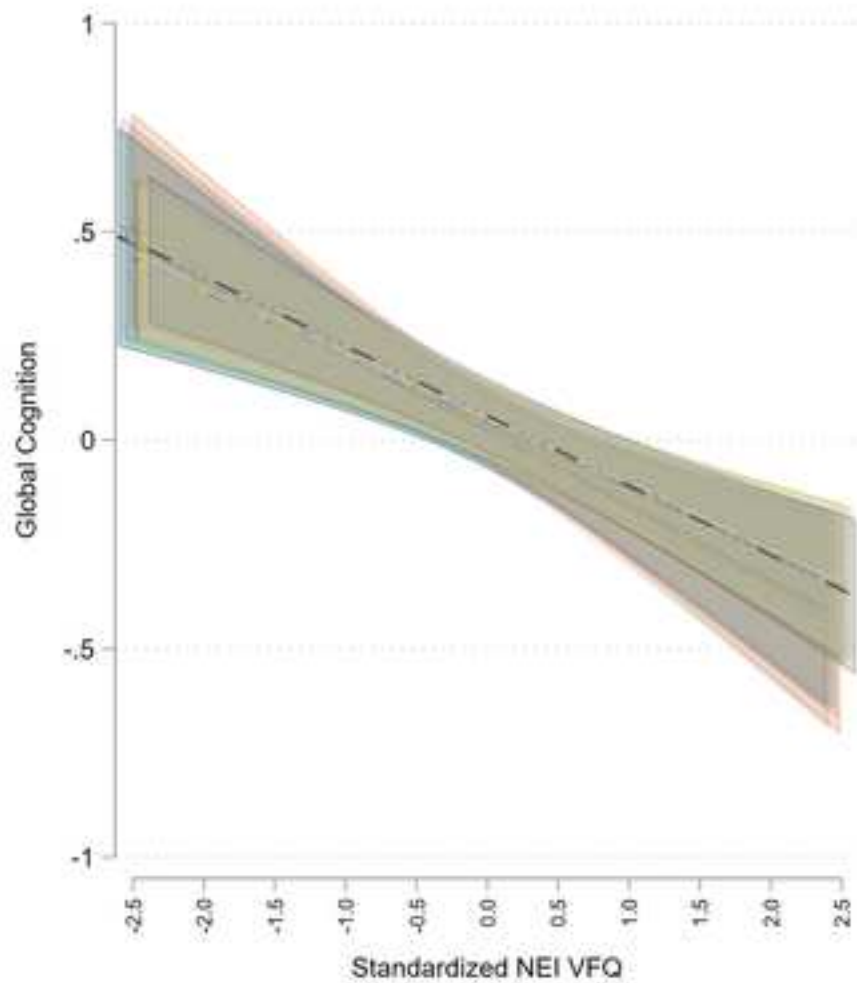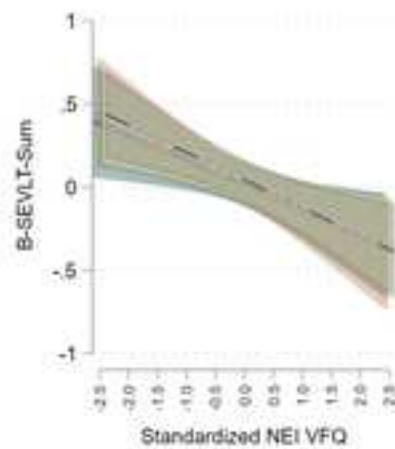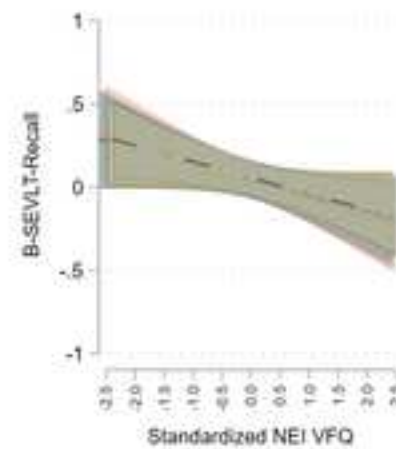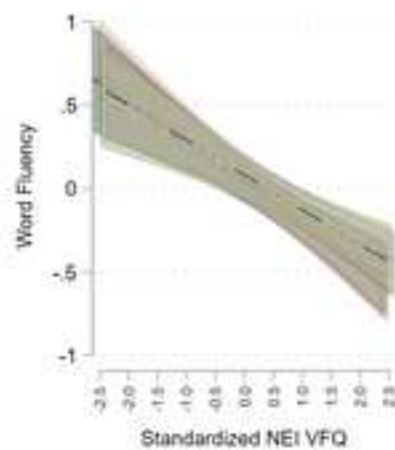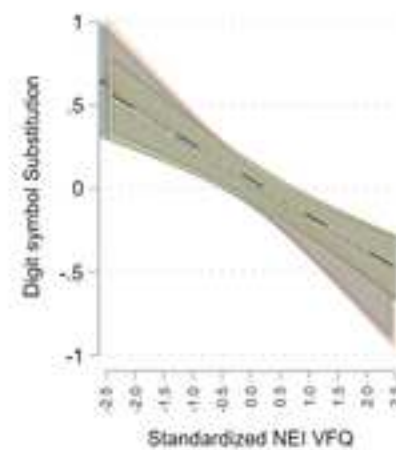

- |             |                 |                   |                     |                   |                     |
|-------------|-----------------|-------------------|---------------------|-------------------|---------------------|
| — Model 1_1 | - - - Model 1_2 | - · · · Model 1_3 | · · · · · Model 1_4 | - · · · Model 1_5 | · · · · · Model 1_6 |
| — Model 2_1 | - - - Model 2_2 | - · · · Model 2_3 | — Model 2_4         | — Model 2_5       | - · · · Model 2_6   |

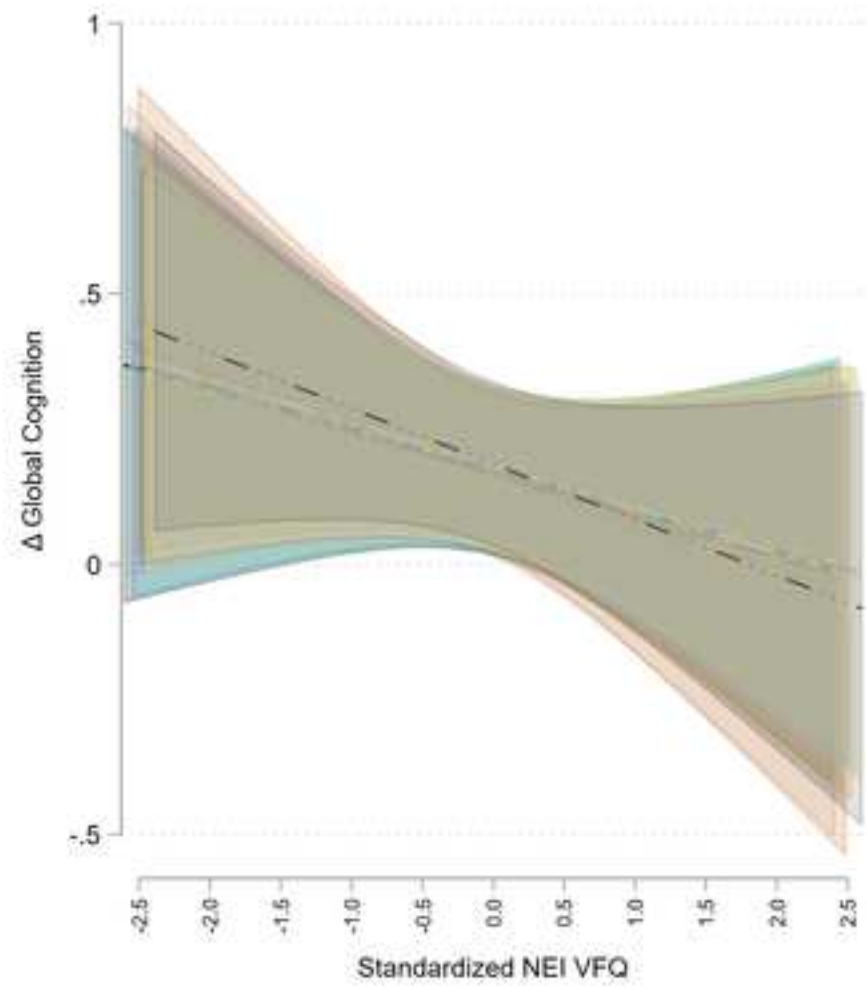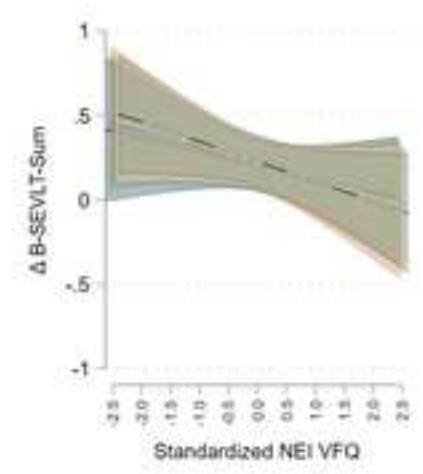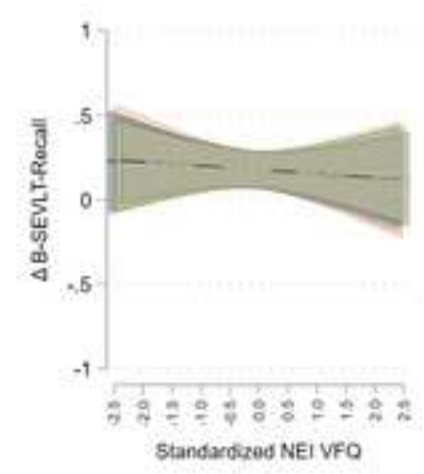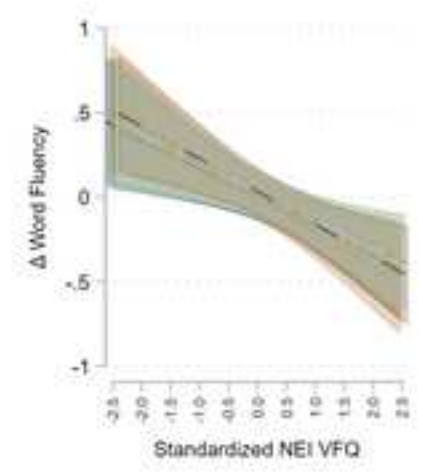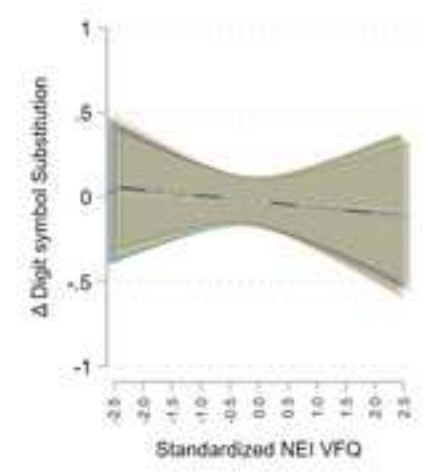

- |             |               |                   |                   |                   |                   |
|-------------|---------------|-------------------|-------------------|-------------------|-------------------|
| — Model 1_1 | - - Model 1_2 | - · · · Model 1_3 | · · · · Model 1_4 | - · · · Model 1_5 | · · · · Model 1_6 |
| — Model 2_1 | - - Model 2_2 | - · · · Model 2_3 | — Model 2_4       | — Model 2_5       | - · · · Model 2_6 |
